# Supplementary material
Source: PubMed Central journal article supplement (PMC6221993)
Supplement: NIHMS1502875-supplement-1.pdf [file NIHMS1502875-supplement-1.pdf]

**Inventory of Supplemental Files**  
**Courtney, Bezwada et al., 2018**

**Supplemental Table 1:** Isotopologue Distributions for clear cell renal cell carcinoma (ccRCC) patient samples infused with [U-<sup>13</sup>C]glucose. Values corrected for naturally occurring <sup>13</sup>C carbon. Related to Figures 1E, 1F, 2, and 3. Included in Supplemental Excel File. Tab: S1\_KIDNEY\_Isotopologue

**Supplemental Table 2:** Isotopologue Distributions for brain tumor patient samples infused with [U-<sup>13</sup>C]glucose. Values corrected for naturally occurring <sup>13</sup>C carbon. Related to Figure 3. Included in Supplemental Excel File. Tab: S2\_BRAIN\_Isotopologue

**Supplemental Table 3:** Clinical Characteristics of Brain Tumor Patients. Related to Figure 3. Below.

| <b>Patient Number</b> | <b>Diagnosis</b>                                 | <b>Other</b>    | <b>Age at Diagnosis</b> | <b>Tumor Location</b> |
|-----------------------|--------------------------------------------------|-----------------|-------------------------|-----------------------|
| BR1                   | Anaplastic Ependymoma                            |                 | 47                      | Left parietal lobe    |
| BR2                   | Anaplastic Astrocytoma                           |                 | 64                      | Right temporal lobe   |
| BR3                   | Breast cancer brain metastasis                   | ER-, PR-, HER2+ | 38                      | Right cerebellum      |
| BR4                   | Non small cell lung cancer brain metastasis      | adenocarcinoma  | 62                      | Right parietal lobe   |
| BR5                   | Clear cell renal cell carcinoma brain metastasis |                 | 70                      | Right frontal lobe    |
